# Supplementary material for: Covalently bonded surface functional groups on carbon nanotubes: from molecular modeling to practical applications
Source: Royal Society of Chemistry journal article supplement (doi:10.1039/d0nr09057c), 2021-01-01
Supplement: d0nr09057c1.pdf [file d0nr09057c1.pdf]

## Covalently bonded surface functional groups on carbon nanotubes: from molecular modelling to practical applications

Aleksandra Benko<sup>1,\*</sup>, Joanna Duch<sup>2</sup>, Marta Gajewska<sup>3</sup>, Mateusz Marzec<sup>3</sup>, Andrzej Bernasik<sup>4</sup>, Marek Nocuń<sup>1</sup>, Witold Piskorz<sup>2</sup>, Andrzej Kotarba<sup>2,\*</sup>

<sup>1</sup>AGH University of Science and Technology, Faculty of Materials Science and Ceramics, 30 A. Mickiewicz Ave. 30-059 Krakow, Poland

<sup>2</sup> Faculty of Chemistry, Jagiellonian University, Gronostajowa 2, 30-387, Krakow, Poland

<sup>3</sup>AGH University of Science and Technology Academic Centre for Materials and Nanotechnology, 30 A. Mickiewicz Ave. 30-059 Krakow, Poland

<sup>4</sup> AGH University of Science and Technology, Faculty of Physics and Applied Computer Science, 30 A. Mickiewicz Ave. 30-059 Krakow, Poland

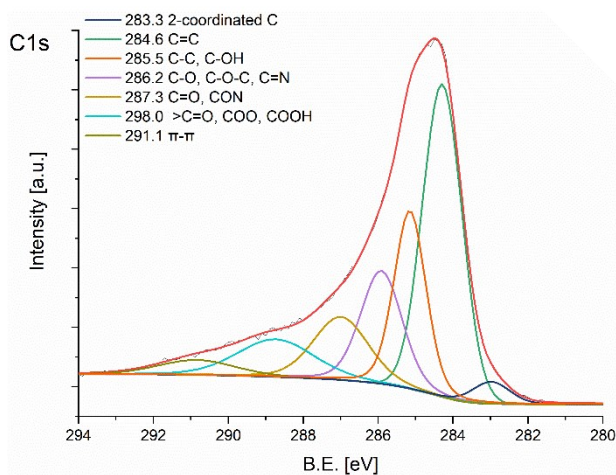

SM 1 Results of the XPS peak deconvolution of the carbon atoms present in the LO sample.

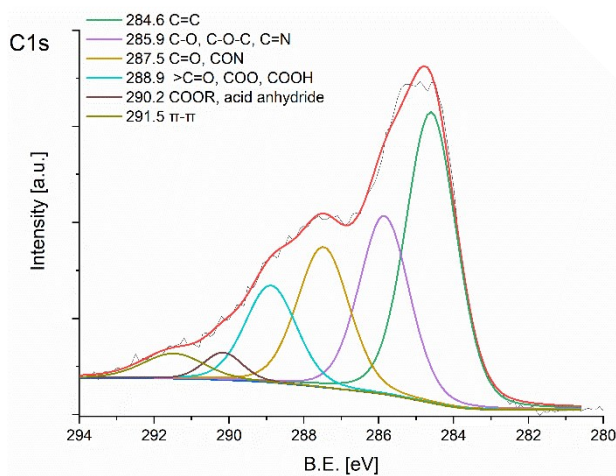

SM 2 Results of the XPS peak deconvolution of the carbon atoms present in the HO sample.

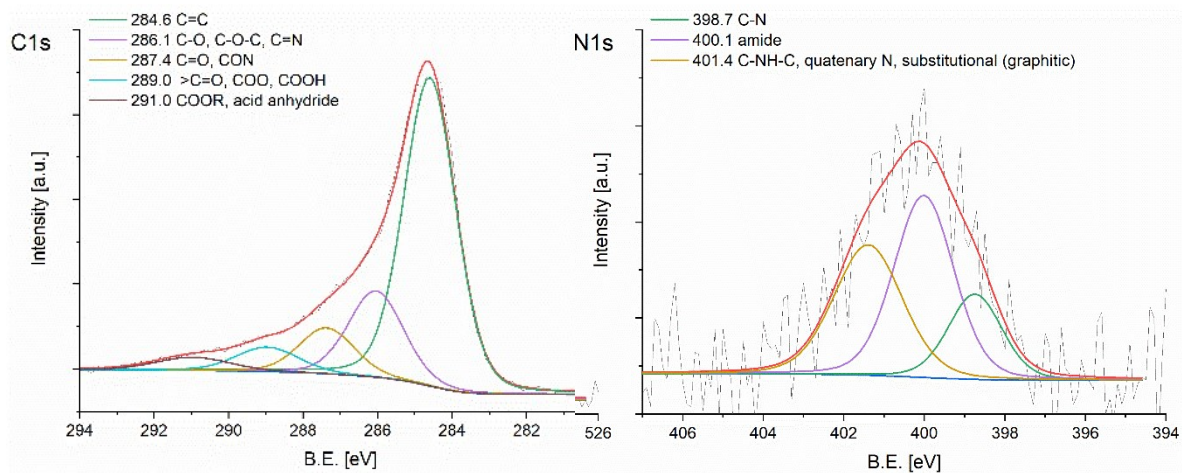

SM 3 Results of the XPS peak deconvolution of the carbon and nitrogen atoms present in the LNH sample.

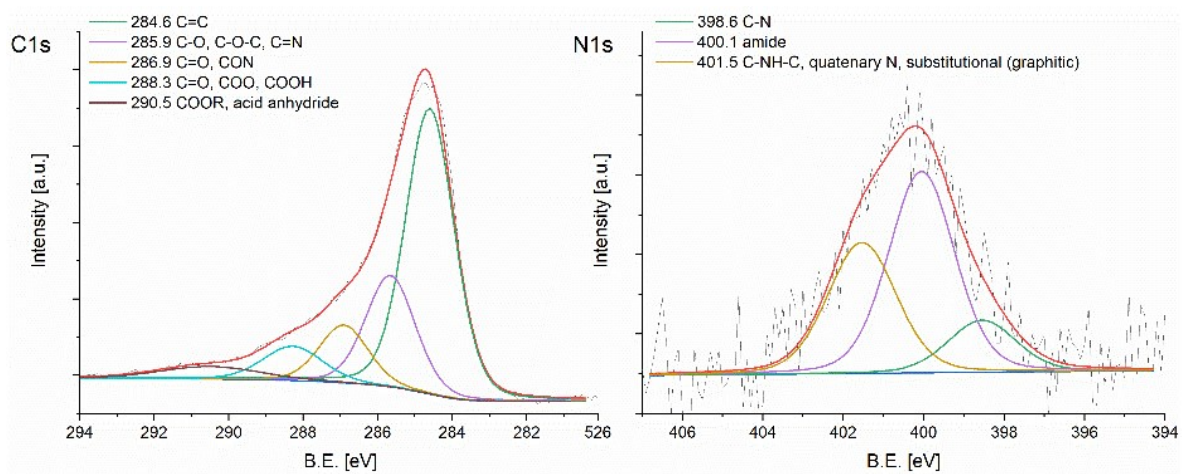

SM 4 Results of the XPS peak deconvolution of the carbon and nitrogen atoms present in the HNH sample.

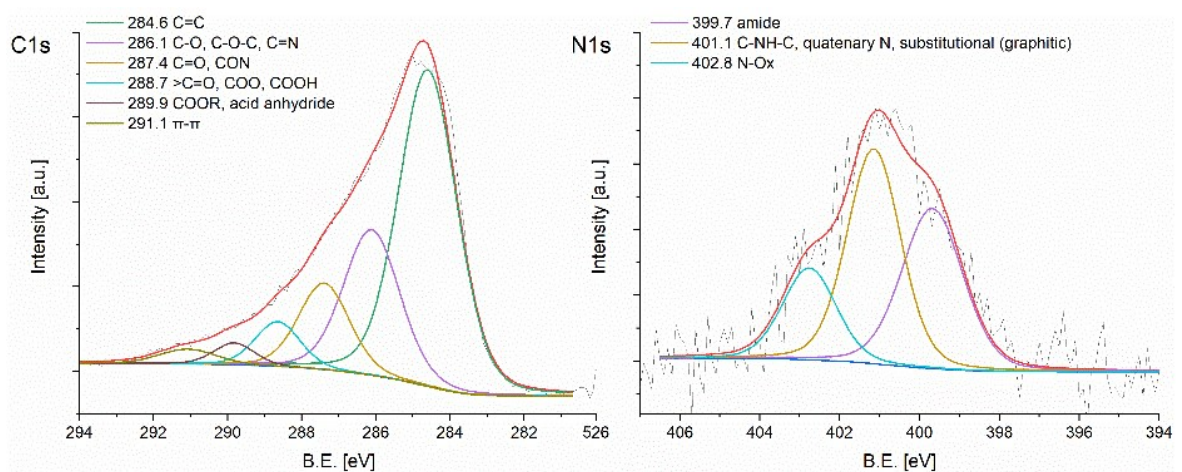

SM 5 Results of the XPS peak deconvolution of the carbon and nitrogen atoms present in the HDEA sample.

SM Table 1 XPS data for the C1s envelope of the investigated materials

| B.E [ev]    | Carbon species  | LO   | HO   | LNH  | HNH  | HDEA |
|-------------|-----------------|------|------|------|------|------|
|             |                 | at.% | at.% | at.% | at.% | at.% |
| 283.3       | 2-coordinated C | 2.3  | -    | -    | -    | -    |
| 284.6       | C=C             | 31.9 | 32.1 | 53.5 | 46.7 | 44.4 |
| 285.5       | C-C, C-OH, C-N  | 16.2 | -    | -    | -    | -    |
| 285.9-286.2 | C-O, C-O-C, C=N | 13.3 | 19.5 | 15.8 | 18.4 | 19.7 |
| 286.9-287.5 | C=O, CON        | 9.9  | 15.9 | 8.4  | 9.5  | 10.5 |
| 288.3-289.0 | >C=O, COO, COOH | 8.2  | 10.8 | 5.1  | 6.8  | 4.8  |
| 290.0-290.9 | COOR, acid anh. | -    | 2.3  | 3.2  | 4.2  | 4.2  |
| 291.1-291.3 | $\pi$ - $\pi$   | 3.3  | 3.4  | -    | -    | 2.0  |

SM Table 2 XPS data for the N1s envelope of the investigated materials.

| B.E [ev]    | Nitrogen species                                 | LNH  | HNH  | HDEA |
|-------------|--------------------------------------------------|------|------|------|
|             |                                                  | at.% | at.% | at.% |
| 398.5-398.7 | C-N                                              | 0.4  | 0.3  |      |
| 400.1       | amide                                            | 0.9  | 1.2  | 0.8  |
| 401.5       | C-NH-C, quaternary N, substitutional (graphitic) | 0.7  | 0.8  | 1.0  |
| 402.8       | N-Ox                                             |      |      | 0.4  |

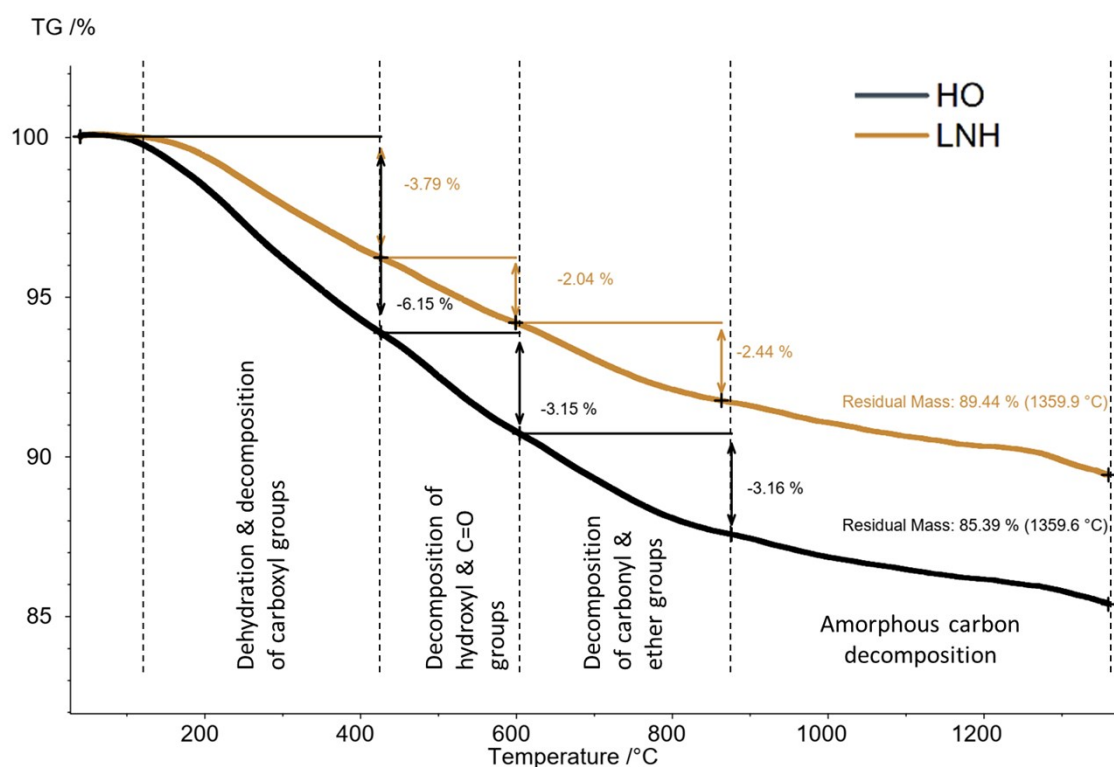

SM 6 TG curves obtained by heating the HO and LO samples up to 1360°C

SM Table 3 Raman data of the peaks' positions and areas of the investigated materials.

| Material |    | position | area | FWHM | D/G | 2D/G |
|----------|----|----------|------|------|-----|------|
| MWCNTs   | D  | 1346.3   | 41.4 | 46.1 | 1.0 | 1.7  |
|          | G  | 1572.6   | 40.7 | 36.9 |     |      |
|          | D' | 1629.9   | 41.9 | 76.8 |     |      |
|          | 2D | 2688.4   | 68.1 | 78.2 |     |      |
| LO       | D  | 1345.1   | 51.2 | 51.2 | 1.7 | 1.4  |
|          | G  | 1572.1   | 30.9 | 41.6 |     |      |
|          | D' | 1624.9   | 37.4 | 81.9 |     |      |
|          | 2D | 2687.0   | 42.0 | 91.5 |     |      |
| HO       | D  | 1344.0   | 47.2 | 48.5 | 1.7 | 1.6  |
|          | G  | 1570.5   | 28.0 | 36.1 |     |      |
|          | D' | 1628.0   | 40.3 | 76.2 |     |      |
|          | 2D | 2685.9   | 45.2 | 79.8 |     |      |
| LNH      | D  | 1344.7   | 26.4 | 47.8 | 1.2 | 1.7  |
|          | G  | 1570.4   | 22.4 | 36.0 |     |      |
|          | D' | 1633.4   | 34.3 | 76.5 |     |      |
|          | 2D | 2686.4   | 38.4 | 82.3 |     |      |
| HNH      | D  | 1343.0   | 45.6 | 45.8 | 1.4 | 1.6  |
|          | G  | 1568.5   | 33.0 | 35.3 |     |      |
|          | D' | 1627.3   | 46.1 | 75.7 |     |      |
|          | 2D | 2682.2   | 51.3 | 78.3 |     |      |
| HDEA     | D  | 1346.3   | 47.6 | 51.3 | 1.3 | 1.4  |
|          | G  | 1572.9   | 35.5 | 41.0 |     |      |
|          | D' | 1631.1   | 45.9 | 77.9 |     |      |
|          | 2D | 2688.9   | 51.4 | 82.5 |     |      |

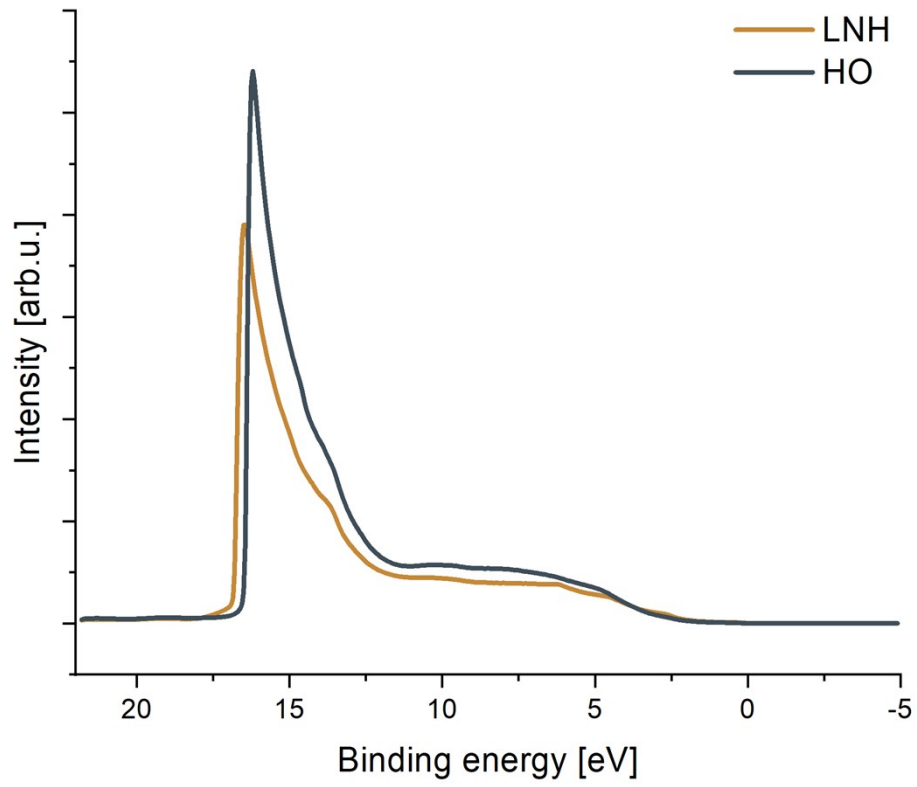

SM 7 UPS spectra of the two representative samples.

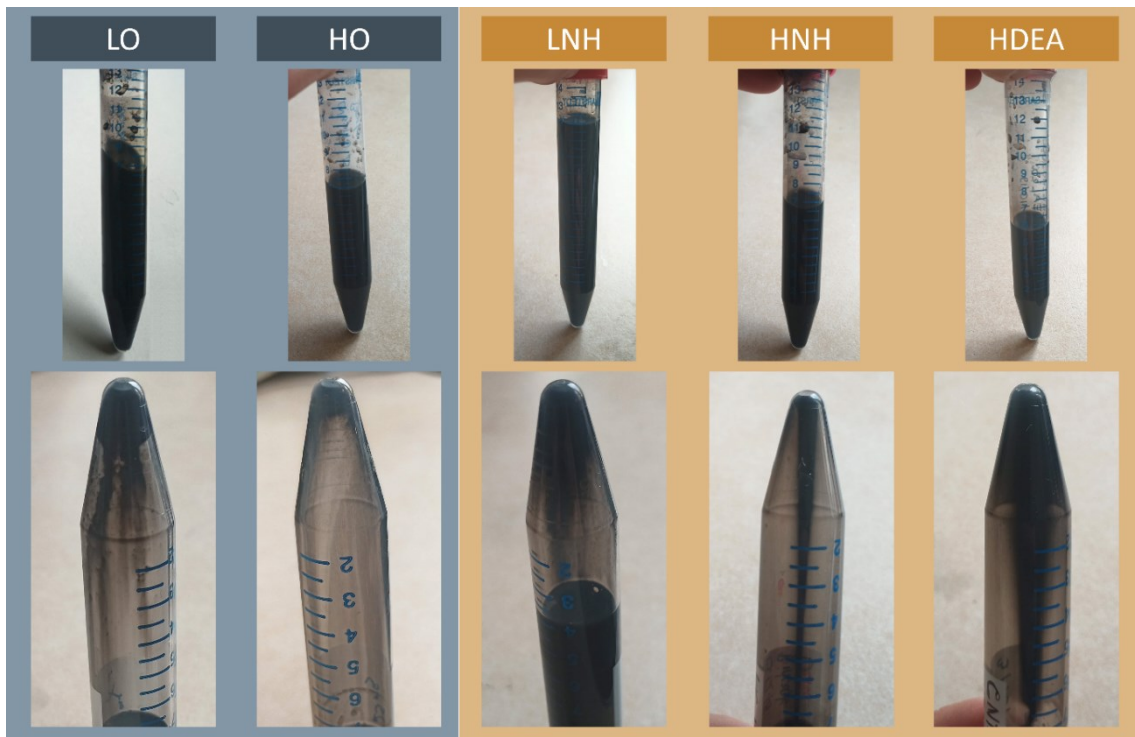

SM 8 Macroscopic investigation of the CNTs dispersions, 3 months after preparation

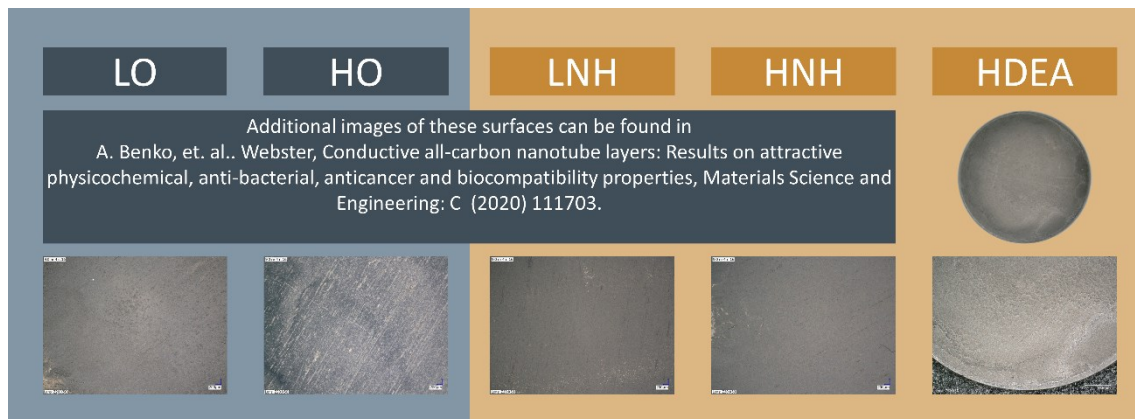

*SM 9 Images of the deposits, observed through a digital, optical microscope*
